# Supplementary material
Source: PubMed Central journal article supplement (PMC4682294)
Supplement: supp_tpc.15.00321_TPC2015-00321-RAR3_Supplemental_Data.pdf [file supp_tpc.15.00321_TPC2015-00321-RAR3_Supplemental_Data.pdf]

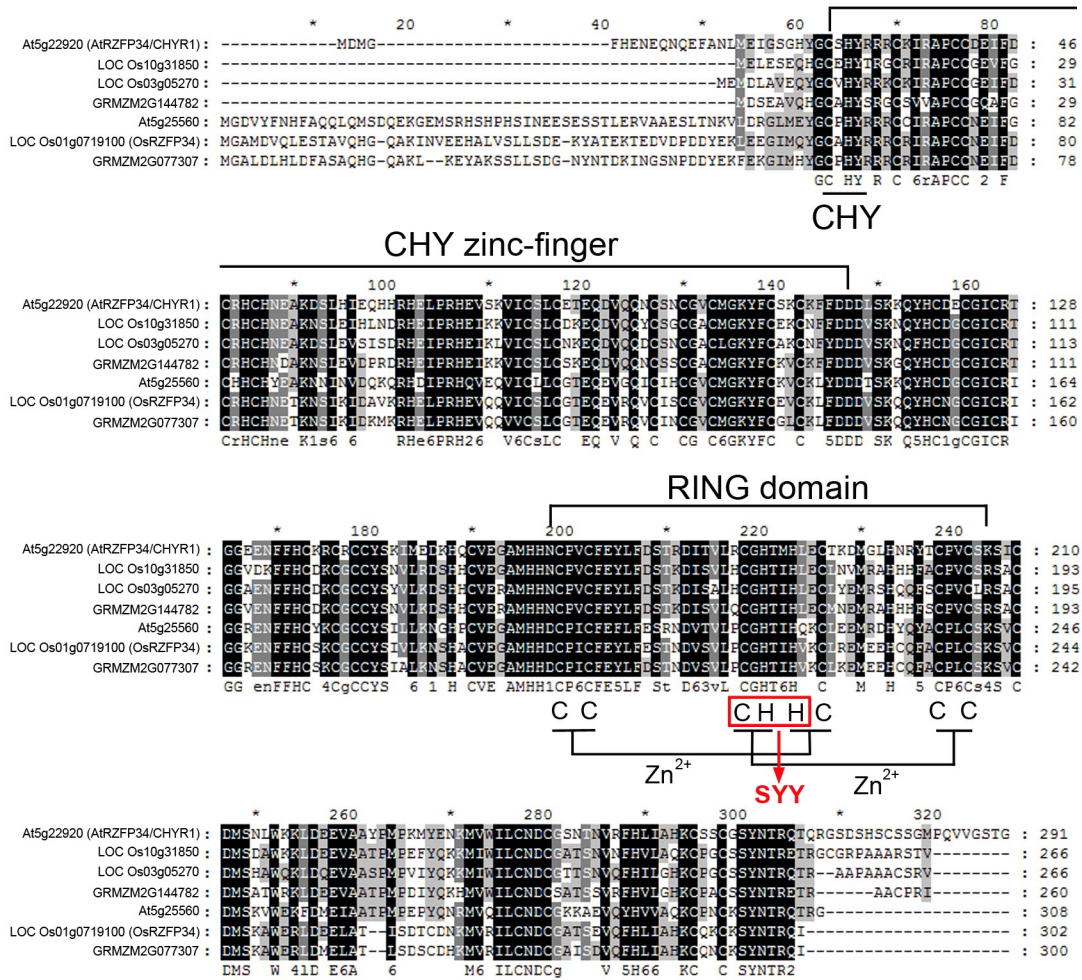

**Supplemental Figure 1. Sequence Alignment of CHYR1 Homologs.**

Seven CHYR1 homologs from different plant species including Arabidopsis (At5g25560), rice (Os10g31850, Os03g05270 and Os01g0719100) and maize (GRMZM2G144782 and GRMZM2G077307) are shown in the alignment. The red frame highlights key cysteine and histidine residues involved in Zn<sup>2+</sup> ion chelation in the RING domain of CHYR1.

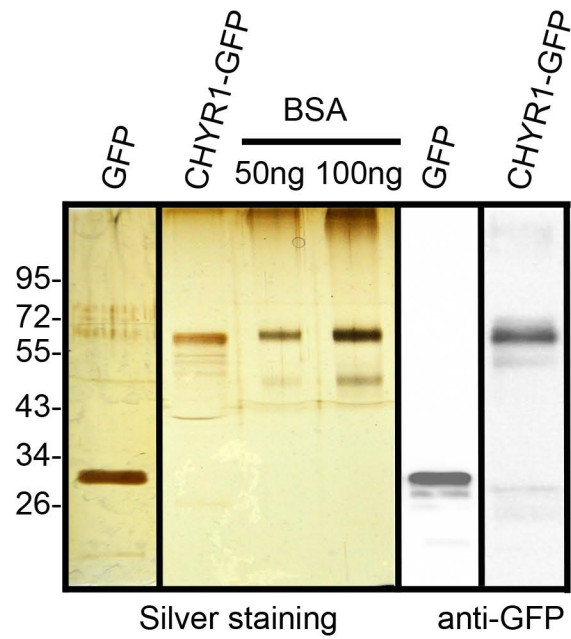

**Supplemental Figure 2. Affinity Purification of CHYR1-GFP Interacting Protein for LC-MS/MS Analysis.**

CHYR1-GFP and its interaction proteins purified with anti-GFP agarose from protein extracts of *35S:CHYR1-GFP* transgenic plants were detected by silver staining (left two panels) and immunoblotting with anti-GFP antibody (right two panels). GFP and its interacting proteins purified from protein extracts of *35S:GFP* transgenic plants were used as negative control in the following LC-MS/MS analysis. 50 ng and 100 ng bovine serum albumin (BSA) were loaded for protein quantification.

A

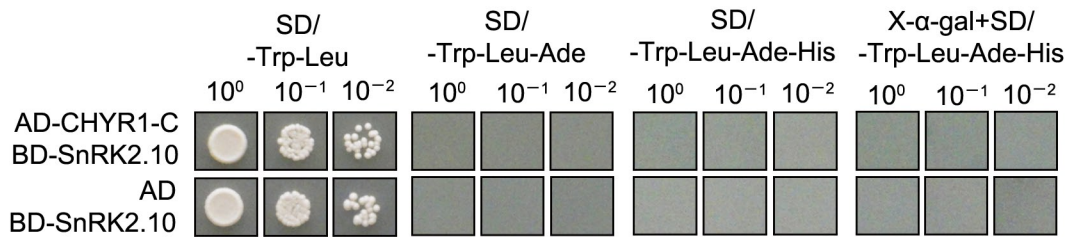

B

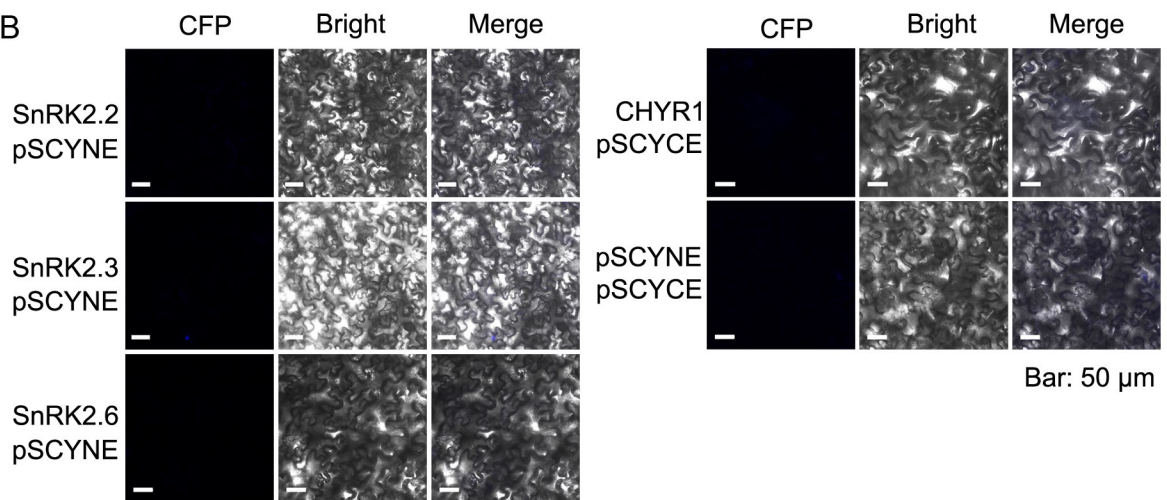

Supplemental Figure 3. Yeast Two-Hybrid Assay of CHYR1 and SnRK2.10 and Negative Controls in BiFC Assays of CHYR1 and SnRK2.2, SnRK2.3, and SnRK2.6.

(A) Yeast two-hybrid assay of CHYR1 and SnRK2.10. Yeast cells expressing the indicated constructs were dropped on synthetic dropout (SD) medium without tryptophan and leucine (SD/-T-L), without tryptophan, leucine and adenine (SD/-T-L-A), without tryptophan, leucine, adenine and histidine (SD/-T-L-A-H), or without tryptophan, leucine, adenine and histidine with 20 mg/ml X- $\alpha$ -gal (X- $\alpha$ -gal+SD/-T-L-A-H).

(B) The construct pairs of pSCYNE-CHYR1 and pSCYCE-SnRK2.2, -SnRK2.3, -SnRK2.6 with empty vector were used as negative controls for the BiFC assays in Figure 5B. Left, middle, and right represent images of cyan fluorescence, brightfield, and merged, respectively.

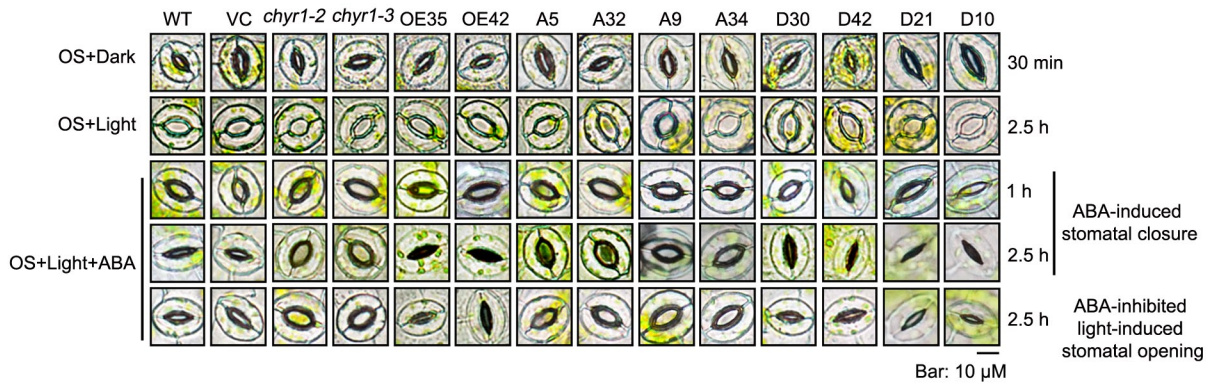

**Supplemental Figure 4. Representative Photos for Stomatal Aperture of WT, *chyr1* Mutants, *35S:CHYR1*, *35S:CHYR1<sup>T178A</sup>* and *35S:CHYR1<sup>T178D</sup>* Plants in ABA Treatment.**

For ABA-induced stomatal closure, leaves from 4-week-old plants were incubated in OS in the dark for 30 min. After exposure to the light for 2.5 h, 5  $\mu$ M ABA was added to the samples to observe the stomatal closure at 1 h and 2.5 h of ABA treatment. For ABA-inhibited light-induced stomatal opening, leaves from 4-week-old plants were incubated in OS for 30 min in dark, and then placed in the light in the presence of 5  $\mu$ M ABA for 2.5 h. The representative photos showed stomatal apertures under different conditions. WT and empty vector control (VC) were used as controls.



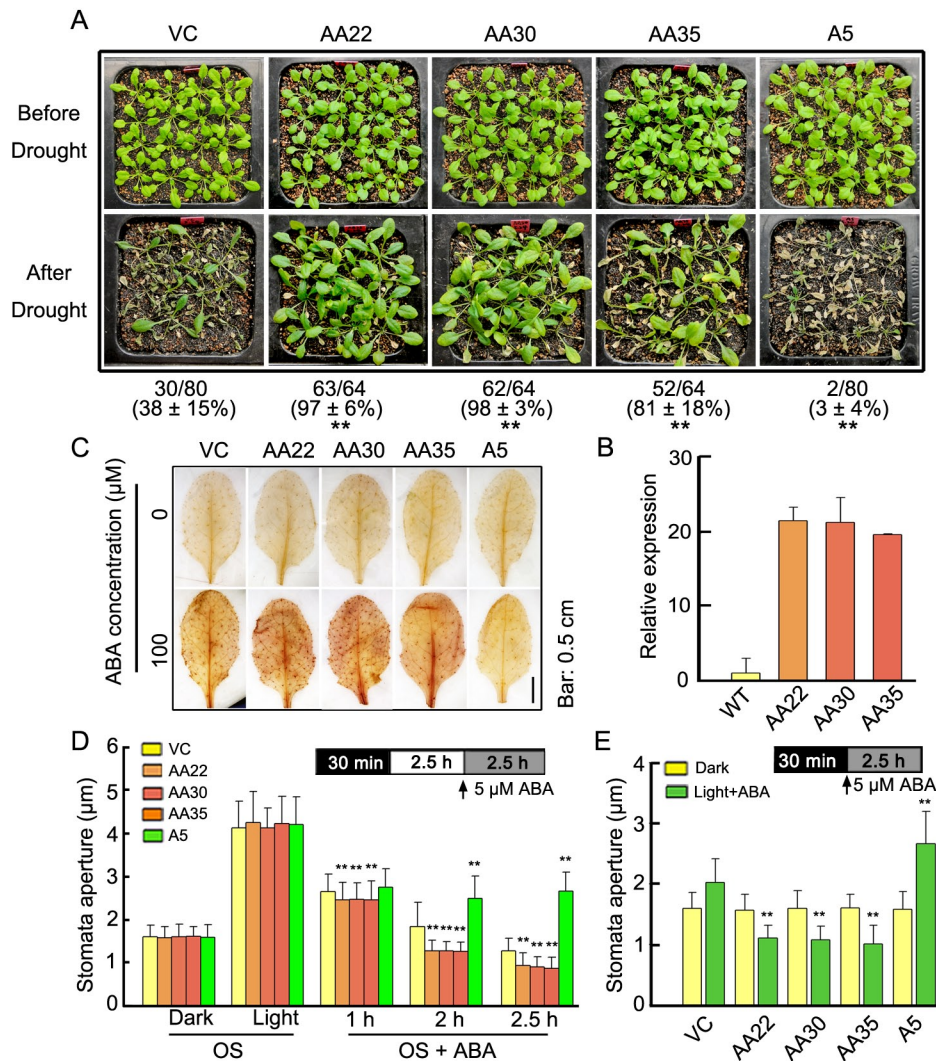

**Supplemental Figure 5. Phenotype Analysis of 35S:CHYR1<sup>S173AS208A</sup> Transgenic Plants.**

(A) Drought tolerance test of 35S:CHYR1<sup>S173AS208A</sup>. Water was withheld from 28-day-old plants for 14 days until differences in wilting were observed. Photographs were taken after 3 days of rewatering. AA22, AA30 and AA35 denotes 35S:CHYR1<sup>S173AS208A</sup> transgenic lines 22, 30, and 35, respectively. 35S:CHYR1<sup>T178A</sup> transgenic plants (A5) were tested as a control. Values represent means ± SD from three biological replicates. Statistic significance between VC and the transgenics was determined by a *t*-test, \**p* < 0.05, \*\**p* < 0.01.

(B) DAB staining indicates different levels of ABA-induced H<sub>2</sub>O<sub>2</sub> production in leaves of VC, 35S:CHYR1<sup>S173AS208A</sup> and 35S:CHYR1<sup>T178A</sup> lines. The red-brown staining indicates H<sub>2</sub>O<sub>2</sub> generation. Representative photos are shown. Scale bar, 0.5 mm.

(C) Relative expression of CHYR1 in the 35S:CHYR1<sup>S173AS208A</sup> lines analyzed by qRT-PCR. Expression of CHYR1 in the WT was determined as 1.0. Values represent means ± SD (n = 3) from three technical replicates.

(D) ABA-induced stomatal closure in VC, the 35S:CHYR1<sup>S173AS208A</sup> and 35S:CHYR1<sup>T178A</sup> lines. Leaves from 4-week-old plants were incubated in OS in dark for 30 min. Then, after exposed to light for 2.5-h, 5 µM ABA was added to the samples to observe the stomatal closure at 1-h, 2-h and 2.5-h ABA treatment. Data were obtained from about 100 stomata for each sample. The error bars were obtained from different stomata. Values represent means ± SD (n > 100) from 3-5 biological replicates. Statistic significance between VC and the transgenics in each treatment was determined by a *t*-test, \**p* < 0.05, \*\**p* < 0.01.

(E) Comparison of ABA-inhibited light-induced stomatal opening among VC, 35S:CHYR1<sup>S173AS208A</sup> and 35S:CHYR1<sup>T178A</sup> plants. Leaves were incubated in OS for 30 min in dark, and then transferred to light in the presence of 5 µM ABA for 2.5-h. Data were obtained from about 100 stomata for each sample. The error bars were obtained from different stomata. Values represent means ± SD (n > 100) from 3-5 biological replicates. Statistic significance between VC and the transgenics in each treatment was determined by a *t*-test, \**p* < 0.05, \*\**p* < 0.01.

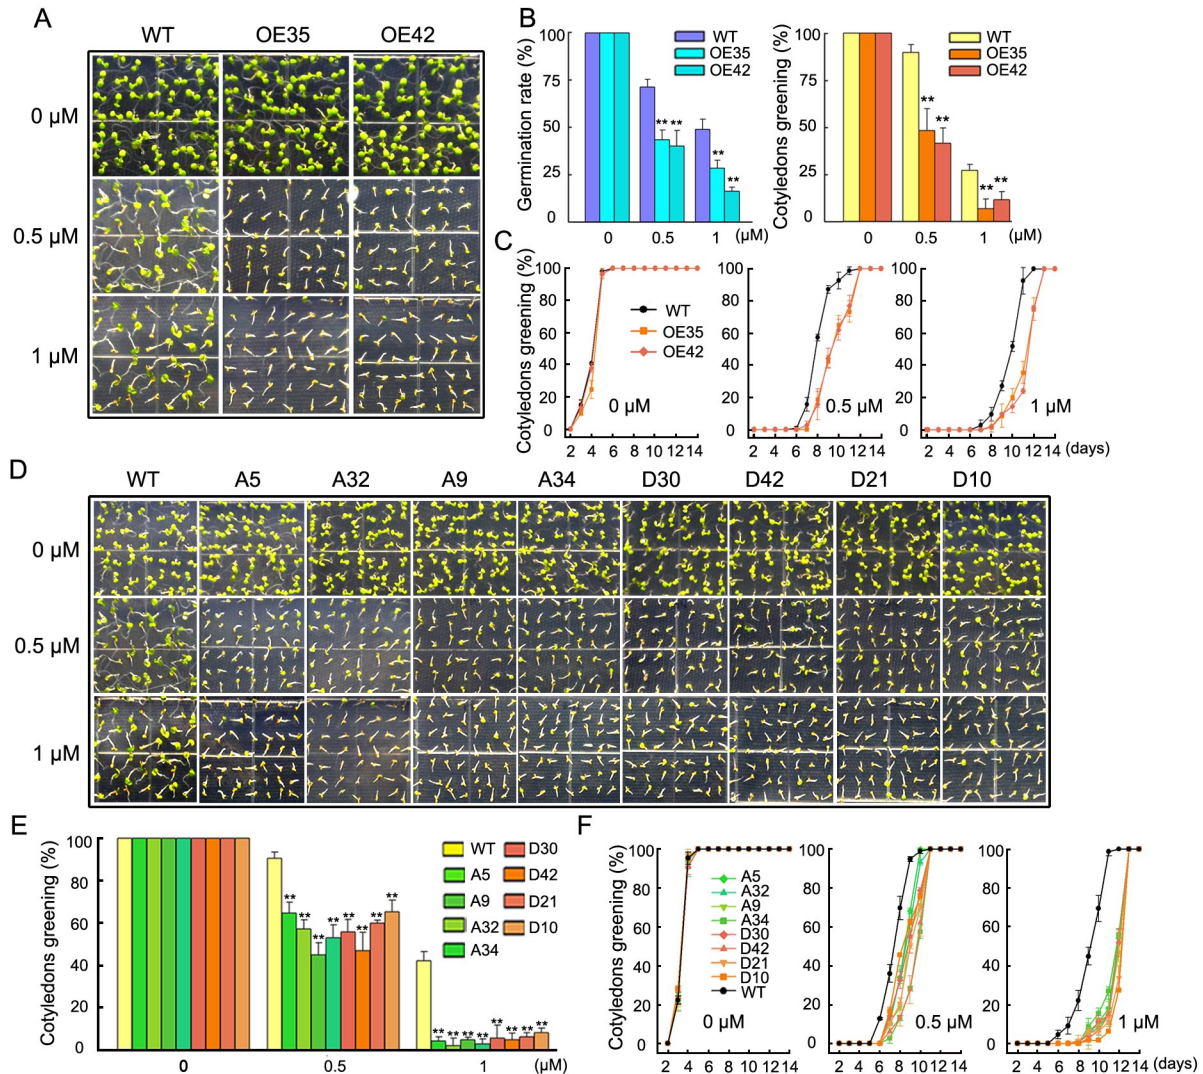

**Supplemental Figure 6. ABA Sensitivity of *35S:CHYR1*, *35S:CHYR1<sup>T178A</sup>* and *35S:CHYR1<sup>T178D</sup>* Transgenic Plants During Seed Germination.**

(A) Representative photo of seed germination of WT and *35S:CHYR1* lines in response to ABA.

(B) Statistical evaluation of the germination rate in terms of radicle emergence and cotyledon greening in response to the indicated ABA concentrations. Values represent means  $\pm$  SD from three biological replicates. Statistic significance between WT and T3 generation of the transgenics in each ABA concentrations was determined by a *t*-test, \**p* < 0.05, \*\**p* < 0.01.

(C) Germination rate at different time points of WT and *35S:CHYR1* lines in terms of cotyledon greening. Values are presented as means  $\pm$  SE (*n* = 3). \**p* < 0.05, \*\**p* < 0.01, by a *t*-test.

(D) Germination tests of WT, *35S:CHYR1<sup>T178A</sup>* and *35S:CHYR1<sup>T178D</sup>* transgenic lines in response to ABA.

(E) Statistical evaluation of the germination rate in terms of cotyledon greening in response to the indicated ABA concentrations. Values represent means  $\pm$  SD from three biological replicates. Statistic significance between WT and T3 generation of the transgenics in each ABA concentrations was determined by a *t*-test, \*\**p* < 0.01.

(F) Germination rate at different time points of WT, *35S:CHYR1<sup>T178A</sup>* and *35S:CHYR1<sup>T178D</sup>* transgenic lines. Values are presented as means  $\pm$  SD (*n* = 3). \*\**p* < 0.01, by a *t*-test.

**Supplemental Table 1. PCR Primer Sequences Used for This Research.**

| Name                              | DNA sequence (5' to 3')           | Purpose                       |
|-----------------------------------|-----------------------------------|-------------------------------|
| SALK_045606-LP                    | ACACATTGGTGTTCCTCC                | genotyping PCR                |
| SALK_045606-RP                    | TGCGAATCTAATGGAGATTGG             | genotyping PCR                |
| SALK_117324-LP                    | AAACACCAATGTGTTGAAGGC             | genotyping PCR                |
| SALK_117324-RP                    | TCATGAAAATGTGCAAATTCG             | genotyping PCR                |
| SALK_LBb1.3                       | ATTTTGCCGATTCGGAAC                | genotyping PCR                |
| CHYR1-RT-F1                       | ATGGATATGGGTTTCCATGAAA            | RT-PCR                        |
| CHYR1-RT-R1                       | CTCAAAACAAACCGGGCA                | RT-PCR                        |
| CHYR1-RT-R2                       | TTAACCGGTTGAACCAACAA              | RT-PCR                        |
| 18S rRNA-RT-For                   | AAACGGCTACCACATCCAAG              | RT-RCR/qRT-PCR                |
| 18S rRNA-RT-Rev                   | CCTCCAATGGAATCCTCGTTA             | RT-RCR/qRT-PCR                |
| CHYR1-qRT-F                       | GCAGACATTGCCACAACGAA              | qRT-PCR                       |
| CHYR1-qRT-R                       | TCGAGGAAGCTCATGTCTATGATG          | qRT-PCR                       |
| RAB18-qRT-For                     | GGCTTGGGAGGAATGCTT                | qRT-PCR                       |
| RAB18-qRT-Rev                     | TTGATCTTTGTGTTATTCCCTTCT          | qRT-PCR                       |
| RD29A-qRT-For                     | TGGACACGAATTCTCCATCA              | qRT-PCR                       |
| RD29A-qRT-Rev                     | TTCCAGCTCAGCTCCTGATT              | qRT-PCR                       |
| RD20-qRT-For                      | TTAGCTCCGGTCACCAGTCA              | qRT-PCR                       |
| RD20-qRT-Rev                      | CATGTATGGTTTTGGTAATGTTTCC         | qRT-PCR                       |
| LEA14-qRT-For                     | GATTTCTTCTGATCGACAAAACCTA         | qRT-PCR                       |
| LEA14-qRT-Rev                     | AGCAAACCCAACCTTATTACATTACG        | qRT-PCR                       |
| DREB2A-qRT-For                    | GACCTAAATGGCGACGATGT              | qRT-PCR                       |
| DREB2A-qRT-Rev                    | TCGAGCTGAAACGGAGGTAT              | qRT-PCR                       |
| RbohF-qRT-For                     | CTGCGGTTTCGCCATTC                 | qRT-PCR                       |
| RbohF-qRT-Rev                     | TGTTTCGTCGGCTCTG                  | qRT-PCR                       |
| RbohD-qRT-For                     | ATTACAAGCACCAAACCGAG              | qRT-PCR                       |
| RbohD-qRT-Rev                     | TGCCAAGCCATAACATCA                | qRT-PCR                       |
| ATGoS2-qRT-For                    | GACGAGTCTCTTGATTACAAGAATGTT       | qRT-PCR                       |
| ATGoS2-qRT-Rev                    | AAACTGCTGAAGTGTCTGTTGC            | qRT-PCR                       |
| Actin2-qRT-For                    | GCCATCCAAGCTGTTCTCTC              | qRT-PCR                       |
| Actin2-qRT-Rev                    | GCTCGTAGTCAACAGCAACAA             | qRT-PCR                       |
| CHYR1 CDS <i>Bam</i> HI For       | atGGATCCATGGATATGGGTTTCCATGAAA    | 35S:CHYR1/35S:CHYR1-cGFP      |
| CHYR1 CDS <i>Xho</i> I Rev        | atCTCGAGACCGGTTGAACCAACAA         | 35S:CHYR1/35S:CHYR1-cGFP      |
| CHYR1promoter <i>Hind</i> III For | aaGAATCCGATGATGACGAAGATATGCTTTT   | GUS staining                  |
| CHYR1promoter <i>Eco</i> RI Rev   | aaAAGCTTACTTTACCTAAAGTTTTGATCTTTC | GUS staining                  |
| CHYR1 RING CHH/SYY For            | CTACGATCTGGTTACACTATGTATCTAGAA    | CHYR1 RING mutagenesis        |
| CHYR1 RING CHH/SYY Re             | TTCTAGATACATAGTGTAAACCAGATCGTAG   | CHYR1 RING mutagenesis        |
| CHYR1 RING T178A For              | AACAAGAGATATCGCTGTCCTACGAT        | CHYR1 RING mutagenesis        |
| CHYR1 RING T178A Rev              | ATCGTAGGACAGCGATATCTCTTGTT        | CHYR1 RING mutagenesis        |
| CHYR1 RING T178D For              | AACAAGAGATATCGATGTCCTACGAT        | CHYR1 RING mutagenesis        |
| CHYR1 RING T178D Rev              | ATCGTAGGACATCGATATCTCTTGTT        | CHYR1 RING mutagenesis        |
| CHYR1 RING S173A For              | GTTTGATGCAACAAGAGATATCACTGTCCT    | CHYR1 RING mutagenesis        |
| CHYR1 RING S173A Rev              | AGGACAGTGATATCTCTTGTGTCATCAAAC    | CHYR1 RING mutagenesis        |
| CHYR1 RING S208A For              | CTCCAAA GCCATATGTGACATGTCTA       | CHYR1 RING mutagenesis        |
| CHYR1 RING S208A Rev              | TAGACATGTCACATATGGCTTTGGAG        | CHYR1 RING mutagenesis        |
| CHYR1 RING S173D For              | GTTTGATGATACAAGAGATATCACTGTCCT    | CHYR1 RING mutagenesis        |
| CHYR1 RING S173D Rev              | AGGACAGTGATATCTCTTGTATCATCAAAC    | CHYR1 RING mutagenesis        |
| CHYR1 RING S208D For              | GCTCCAAA GATATATGTGACATGTCTAATC   | CHYR1 RING mutagenesis        |
| CHYR1 RING S208D Rev              | GATTAGACATGTCACATATATCTTTGGAGC    | CHYR1 RING mutagenesis        |
| CHYR1 161th aa For                | CACAATTGCCCGGTTT                  | In-gel kinases                |
| CHYR1 216th aa Rev                | CCACAGATTAGACATGTACATAT           | In-gel kinases                |
| UBP CDS <i>Bam</i> HI For         | ATGGATCCATGCAGATCTTTGTTAAGAC      | Ubiquitin recombinant protein |

| Name                      | DNA sequence (5' to 3')        | Purpose                          |
|---------------------------|--------------------------------|----------------------------------|
| UBP CDS <i>Eco</i> RI Rev | ATGAATTCTAACCACCACGGAGCC       | Ubiquitin recombinant protein    |
| UBP-K48R-For              | CTTATTTTCGCCGGAGAACAGCTAGAGGAT | Ubiquitin 48th Lys mutant to Arg |
| UBP-K48R-Rev              | ATCCTCTAGCTGTTCTCCGGCGAAAATAAG | Ubiquitin 48th Lys mutant to Arg |
| UBP-K63R-For              | TACAATATCCAGAGAGAATCCACCCTCCAC | Ubiquitin 63th Lys mutant to Arg |
| UBP-K63R-Rev              | GTGGAGGGTGGATTCTCTCTGGATATTGTA | Ubiquitin 63th Lys mutant to Arg |
| SnRK2.2 CDS For           | ATGGATCCGGCGACTAATT            | Y2H & BiFC & Co-IP               |
| SnRK2.2 CDS Rev           | GAGAGCATAAACTATCTCTCCACTACTG   | Y2H & BiFC & Co-IP               |
| SnRK2.3 CDS For           | ATGGATCGAGCTCCGGT              | Y2H & BiFC & Co-IP               |
| SnRK2.3 CDS Rev           | GAGAGCGTAAACTATCTCTCCG         | Y2H & BiFC & Co-IP               |
| SnRK2.6 CDS For           | ATGGATCGACCAGCAGTG             | Y2H & BiFC & Co-IP               |
| SnRK2.6 CDS Rev           | CATTGCGTACACAATCTCTCC          | Y2H & BiFC & Co-IP               |
